# Supplementary material for: Universal Principles in the Repair of Communication Problems
Source: PLOS journal article supplement (doi:10.1371/journal.pone.0136100), 2015-09-16
Supplement: S4 (10.1371/journal.pone.0136100.s004) [file journal.pone.0136100.s004]

## Supplementary Information 3

### Operation model

#### 3.1 Introduction

This model investigates the relation between repair solution and trouble source as a function of repair initiator type. See the main model supplementary materials for a description of the variables and data.

The relative length of the trouble source compared to the repair solution was calculated as:

$$TS\_RS\_relLength = \log\left(\frac{RS\_Clength}{TS\_Clength}\right) \quad (3.1)$$

##### 3.1.1 Model structure

Below is the R code for the model structure:

```
TS_RS_relLength~  
RI_identity +  
TS_vis +  
seq_intervene +  
TS_aud.bin +  
TS_par +  
soundproof +  
(1 + RI_identity + TS_vis + TS_aud.bin + TS_par+ seq_intervene| language)  
+ (1 + TS_vis + TS_aud.bin + TS_par+ seq_intervene | recording)  
+ (1 | language.family)
```

## 3.2 Results

The results for the fixed effects are found in table 3.1, and the probability estimates are shown in table 3.2. Adding a random slope for RI type by language did not improve the fit of the model (table 3.3).

Table 3.1: Fixed effects results for the operation model.

|                  | Estimate | Std. Error | t value |
|------------------|----------|------------|---------|
| (Intercept)      | -1.45345 | 0.12075    | -12.037 |
| RI_identityR1    | 0.55538  | 0.11957    | 4.645   |
| RI_identityO     | 0.96317  | 0.13532    | 7.117   |
| TS_visyes        | -0.11216 | 0.17312    | -0.648  |
| seq_interveneyes | -0.03275 | 0.13408    | -0.244  |
| TS_aud.binTRUE   | 0.22501  | 0.10336    | 2.177   |
| TS_paryes        | 0.14135  | 0.10629    | 1.330   |
| soundproofTRUE   | 0.26358  | 0.22668    | 1.163   |

Table 3.2: Probability estimates for fixed effects in the operation model.

|               | Chisq   | Df | Pr(> $\chi^2$ ) |
|---------------|---------|----|-----------------|
| RI_identity   | 50.6628 | 2  | 9.971e-12 ***   |
| TS_vis        | 0.4198  | 1  | 0.51706         |
| seq_intervene | 0.0596  | 1  | 0.80705         |
| TS_aud.bin    | 4.7387  | 1  | 0.02949 .       |
| TS_par        | 1.7686  | 1  | 0.18355         |
| soundproof    | 1.3521  | 1  | 0.24492         |

Table 3.3: Model comparison between main operation model and model without RI type as a random slope by language.

|                         | Df | AIC    | BIC    | logLik  | deviance | Chisq | Chi | Df | Pr(> $\chi^2$ ) |
|-------------------------|----|--------|--------|---------|----------|-------|-----|----|-----------------|
| No RI slope by language | 44 | 4499.7 | 4731.7 | -2205.8 | 4411.7   |       |     |    |                 |
| Main model              | 53 | 4831.4 | 5110.9 | -2362.7 | 4725.4   | 0     |     | 9  | 1               |
